# Supplementary material for: First Report on Microcystin-LR Occurrence in Water Reservoirs of Eastern Cuba, and Environmental Trigger Factors
Source: MDPI journal article supplement (doi:10.3390/toxins14030209), 2022-03-15
Supplement: s1 [file s1]

# Supplementary Materials: First Report on Microcystin-LR Occurrence in Water Reservoirs of Eastern Cuba, and Environmental Trigger Factors

José Carlos Rodríguez Tito, Liliana Maria Gomez Luna, Wim Noppe Noppe and Inaudis Alvarez Hubert

**Table S1** Database of the 24 studied reservoirs at the eastern Cuba.

| Reservoir     | Volume                              | Depth | Catchment area     | Inhabitants per km <sup>2</sup> | Localization |            | Uses       |           |         |               |              |
|---------------|-------------------------------------|-------|--------------------|---------------------------------|--------------|------------|------------|-----------|---------|---------------|--------------|
|               | (x 10 <sup>6</sup> m <sup>3</sup> ) | (m)   | (km <sup>2</sup> ) | (Inhabitants)                   | Longitude    | Latitude   | Forest (%) | Agric (%) | Ind (%) | Urbanized (%) | Deforest (%) |
| Céspedes      | 243,00                              | 52,0  | 441,91             | 16345                           | 20.275245    | -76.234201 | 50         | 35        | 0       | 5             | 10           |
| Gilbert       | 59,67                               | 43,0  | 144,10             | 3002                            | 20.129631    | -76.076248 | 70         | 20        | 0       | 0             | 10           |
| Gota Blanca   | 83,60                               | 45,4  | 319,99             | 4753                            | 20.164505    | -76.031349 | 70         | 20        | 0       | 0             | 10           |
| Hatillo       | 5,84                                | 22,3  | 108,00             | 820                             | 20.185080    | -70.967581 | 55         | 40        | 0       | 0             | 5            |
| Charco Mono   | 4,50                                | 28,0  | 72,21              | 702                             | 20.121330    | -75.966522 | 80         | 10        | 0       | 0             | 10           |
| Chalóns       | 3,20                                | 9,0   | 12,55              | 4306                            | 20.071577    | -75.813723 | 40         | 30        | 0       | 0             | 30           |
| Parada        | 34,20                               | 33,5  | 55,37              | 18277                           | 20.034779    | -75.896751 | 50         | 10        | 20      | 10            | 10           |
| Mícará        | 4,41                                | 30,6  | 17,21              | 501                             | 20.456192    | -75.518675 | 60         | 20        | 0       | 0             | 20           |
| Joturo        | 2,38                                | 19,0  | 20,53              | 2238                            | 20.183933    | -75.574199 | 30         | 50        | 0       | 0             | 20           |
| Baraguá       | 250,00                              | 43,0  | 1749,61            | 166498                          | 20.398293    | -75.977562 | 20         | 60        | 0       | 10            | 10           |
| Camazán       | 6,70                                | 17,0  | 54,56              | 2259                            | 20.768137    | -76.112311 | 20         | 50        | 0       | 10            | 20           |
| Bio           | 67,50                               | 25,2  | 251,95             | 7256                            | 20.496219    | -76.101932 | 5          | 90        | 0       | 0             | 5            |
| Cauto el Paso | 330,00                              | 30,0  | 8969,20            | 1112010                         | 20.584679    | -76.718730 | 40         | 40        | 5       | 5             | 10           |
| Guisa         | 66,50                               | 56,0  | 95,07              | 21914                           | 20.244891    | -76.568438 | 55         | 25        | 0       | 5             | 15           |
| Bueycito      | 159,00                              | 42,0  | 130,58             | 12004                           | 20.211159    | -76.764833 | 50         | 20        | 0       | 5             | 25           |
| Paso Malo     | 95,60                               | 47,0  | 229,56             | 230                             | 20.128539    | -76.959294 | 80         | 0         | 0       | 5             | 15           |
| Cautillo      | 84,40                               | 42,0  | 176,66             | 10519                           | 20.305233    | -76.509774 | 60         | 30        | 0       | 5             | 5            |
| La Yaya       | 160,00                              | 47,2  | 565,30             | 35727                           | 20.124841    | -75.360015 | 20         | 70        | 0       | 0             | 10           |
| Jaibo         | 120,00                              | 48,5  | 215,86             | 2473                            | 20.201719    | -75.278045 | 60         | 30        | 0       | 0             | 10           |
| Clotilde      | 6,10                                | 27,0  | 55,48              | 396                             | 20.198874    | -75.153287 | 60         | 20        | 0       | 0             | 20           |
| Los Plátanos  | 3,80                                | 11,0  | 22,58              | 135                             | 20.232075    | -75.231228 | 40         | 40        | 0       | 0             | 20           |
| Moa           | 141,00                              | 75,5  | 86,81              | 2000                            | 20.557866    | -74.981418 | 40         | 10        | 30      | 10            | 10           |
| Nipe          | 112,20                              | 35,0  | 397,50             | 10937                           | 20.666997    | -75.846526 | 20         | 55        | 0       | 5             | 20           |
| Gibara        | 65,50                               | 46,3  | 85,97              | 368                             | 20.901041    | -76.113282 | 30         | 60        | 0       | 0             | 10           |

**Table S2** List of cyanobacteria species and potentially toxigenic species in the studied reservoirs in eastern Cuba.

| Cyanophyceae specie                 | 1 | 2 | 3 | 4 | 5 | 6 | 7 | 8 | 9 | 10 | 11 | 12 | 13 | 14 | 15 | 16 | 17 | 18 | 19 | 20 | 21 | 22 | 23 | 24 |
|-------------------------------------|---|---|---|---|---|---|---|---|---|----|----|----|----|----|----|----|----|----|----|----|----|----|----|----|
| <i>Aphanizomenon flos-aquae</i> (T) |   |   |   |   |   |   |   |   |   | x  | x  | x  |    |    |    |    |    | x  |    | x  |    | x  | x  | x  |
| <i>Aphanizomenon gracile</i> (T)    | x |   |   |   |   |   |   |   |   | x  | x  |    |    |    |    |    |    |    |    |    | x  | x  |    |    |
| <i>Aphanocapsa</i> sp. (T)          | x | x | x |   | x | x |   | x | x |    |    |    | x  |    |    | x  |    | x  | x  |    | x  | x  | x  | x  |
| <i>Aphanotece minutissima</i>       | x |   |   |   |   |   |   | x |   |    |    |    | x  | x  |    |    | x  |    |    |    | x  | x  |    | x  |
| <i>Aphanotece</i> sp.               | x | x |   | x |   | x |   |   | x |    |    |    |    |    |    |    | x  |    | x  | x  |    |    |    |    |
| <i>Aphanotece clathrata</i>         | x |   |   |   |   |   |   | x |   |    | x  | x  |    |    |    |    | x  |    |    |    |    | x  |    | x  |
| <i>Chroococcus minutus</i>          |   |   |   |   |   |   |   |   | x |    |    |    |    |    |    |    |    |    |    |    |    |    |    |    |
| <i>Chroococcus</i> sp.              |   |   |   | x |   |   |   |   | x |    |    |    |    | x  | x  |    | x  |    |    |    |    | x  |    | x  |
| <i>Coelosphaerium</i> sp.           |   |   |   |   |   |   |   | x |   |    |    |    |    |    |    |    |    |    |    |    |    |    |    |    |
| <i>Coelosphaerium kuetzingianum</i> |   |   |   |   | x |   |   |   |   |    |    |    |    |    |    |    |    |    |    |    |    |    |    |    |

Legend:1-Céspedes; 2-Gilbert; 3-Gota Blanca; 4-Hatillo; 5-Charco Mono; 6-Chalóns; 7-Parada; 8-Mícara; 9-Joturo; 10- Baraguá; 11-Camazán; 12-Bio; 13-Cauto el Paso; 14-Guisa; 15-Bueycito; 16-Paso Malo; 17-Cautillo;18-La Yaya; 19-Jaibo; 20-Clotilde; 21-Los Plátanos; 22-Moa; 23-Nipe; 24-Gibara; \*= Bloom forming species determined in the reservoirs according to the present research;. (T) = toxic species according previous reports.
